# Supplementary material for: Analysis of factors governing the formation of single-stranded helical coordination polymers from a macrocyclic metalloligand and Ca2+, Mn2+, Fe2+, Co2+, Ni2+, Cu2+, Zn2+ and Pb2+
Source: Royal Society of Chemistry journal article supplement (doi:10.1039/c3ce40124c), 2013-01-01
Supplement: c3ce40124c.pdf [file c3ce40124c.pdf]

## Electronic Supplementary Information

### Analysis of factors governing the formation of single-stranded helical coordination polymers from a macrocyclic metalloligand and $\text{Ca}^{2+}$ , $\text{Mn}^{2+}$ , $\text{Fe}^{2+}$ , $\text{Co}^{2+}$ , $\text{Ni}^{2+}$ , $\text{Cu}^{2+}$ , $\text{Zn}^{2+}$ and $\text{Pb}^{2+}$

Xiao-Zeng Li,\* Peng-Peng Hao, Dan Wang and Li-Na Zhu

Department of Chemistry, Tianjin University, Tianjin 300072, P. R. China

Email: lixiaozeng321@tju.edu.cn, Tel: +86 022 27403475

**Materials and Measurements.** All starting materials and solvents were purchased commercially and were used as received.  $[\text{Na}_8(\text{NiL}^1)_4(\text{C}_2\text{H}_5\text{OH})_6(\text{H}_2\text{O})_{16}] \cdot 2\text{H}_2\text{O}$  was prepared according to the method previously reported by us.<sup>1</sup> Infrared spectra were obtained from KBr pellets on a BIO-RAD 3000 infrared spectrophotometer in the 400-4000  $\text{cm}^{-1}$  region. Elemental analyses of C, H and N were determined with a Perkin-Elmer 240 Elemental Analyzer. Thermogravimetric analyses (TGA) were carried out in nitrogen stream using a STA-409PC equipment at a heating rate of 10  $^{\circ}\text{C}/\text{min}$ . Powder X-ray diffraction (PXRD) data were recorded on a Rigaku D/max 2500v/pc X-ray powder diffractometer ( $\text{Cu K}\alpha$ , 1.5418 Å).

**Synthesis of  $\{[\text{Co}(\text{NiL}^1)(\text{C}_2\text{H}_5\text{OH})(\text{CH}_3\text{OH})(\text{H}_2\text{O})] \cdot \text{CH}_3\text{OH}\}_n$  (1).** A mixture of  $[\text{Na}_8(\text{NiL}^1)_4(\text{C}_2\text{H}_5\text{OH})_6(\text{H}_2\text{O})_{16}] \cdot 2\text{H}_2\text{O}$  (0.040 g, 0.0141 mmol),  $\text{Co}(\text{ClO}_4)_2 \cdot 6\text{H}_2\text{O}$  (0.0210 g, 0.0574 mmol), ethanol (25 ml), methanol (80 ml) and water (60 ml) was stirred to form a red solution. The filtrate of the solution was then stored at room temperature for 7 days, and red crystals suitable for X-ray single crystal analysis were formed. Yield: 0.0183 g (46.5%, calculated on the amount of  $[\text{Na}_8(\text{NiL}^1)_4(\text{C}_2\text{H}_5\text{OH})_6(\text{H}_2\text{O})_{16}] \cdot 2\text{H}_2\text{O}$ ). Anal. Calc. for  $\text{C}_{28}\text{H}_{28}\text{CoN}_4\text{NiO}_{10}$ : C 48.17, H 4.04, N 8.02%. Found: C 48.28, H 4.05, N 8.06%. IR (KBr,  $\text{cm}^{-1}$ ): 3577(s), 3050(m), 2888(m), 1605(s), 1581(s), 1536(s), 1440(m), 1380(s), 1347(m), 752(m).

**Synthesis of  $\{[\text{Cu}(\text{NiL}^1)(\text{H}_2\text{O})_3] \cdot 3\text{H}_2\text{O}\}_n$  (2).** A mixture of  $[\text{Na}_8(\text{NiL}^1)_4(\text{C}_2\text{H}_5\text{OH})_6(\text{H}_2\text{O})_{16}] \cdot 2\text{H}_2\text{O}$  (0.0690 g, 0.0242 mmol),  $\text{CuSO}_4 \cdot 5\text{H}_2\text{O}$  (0.0245 g, 0.0981 mmol), water (140 ml) and DMF (18 ml)

was stirred to form a deep red solution. The filtrate of the solution was then stored at room temperature for 7 days, and red crystals suitable for X-ray single crystal analysis were formed. Yield: 0.0295 g (44.6%, calculated on the amount of  $[\text{Na}_8(\text{NiL}^1)_4(\text{C}_2\text{H}_5\text{OH})_6(\text{H}_2\text{O})_{16}] \cdot 2\text{H}_2\text{O}$ ). Anal. Calc. for  $\text{C}_{24}\text{H}_{24}\text{N}_4\text{CuNiO}_{12}$ : C 42.22, H 3.54, N 8.21%. Found: C 42.33, H 3.55, N 8.22%. IR (KBr,  $\text{cm}^{-1}$ ): 3577(s), 3064(m), 2881(m), 1602(s), 1587(s), 1540(s), 1440(m), 1382(s), 1350(m), 755(s).

**Synthesis of  $\{[\text{Mn}(\text{NiL}^1)(\text{H}_2\text{O})_3] \cdot 3\text{H}_2\text{O}\}_n$  (3).** A mixture of  $[\text{Na}_8(\text{NiL}^1)_4(\text{C}_2\text{H}_5\text{OH})_6(\text{H}_2\text{O})_{16}] \cdot 2\text{H}_2\text{O}$  (0.060 g, 0.0211 mmol),  $\text{Mn}(\text{ClO}_4)_2 \cdot 6\text{H}_2\text{O}$  (0.0363 g, 0.1003 mmol), water (60 ml) and methanol (60 ml) was stirred to form a deep red solution. The filtrate of the solution was then stored at room temperature for 7 days, and red crystals suitable for X-ray single crystal analysis were formed. Yield: 0.0360 g (63.3%, calculated on the amount of  $[\text{Na}_8(\text{NiL}^1)_4(\text{C}_2\text{H}_5\text{OH})_6(\text{H}_2\text{O})_{16}] \cdot 2\text{H}_2\text{O}$ ). Anal. Calc. for  $\text{C}_{24}\text{H}_{24}\text{N}_4\text{MnNiO}_{12}$ : C 42.76, H 3.59, N 8.31%. Found: C 43.12, H 3.30, N 8.13%. IR (KBr,  $\text{cm}^{-1}$ ): 3575(m), 3062(m), 2883(m), 1602(s), 1585(s), 1538(s), 1446(m), 1381(s), 1350(m), 751(s).

**Crystallography for 1.** The diffraction data were collected with a Bruker SMART CCD area detector using graphite-monochromated Mo K $\alpha$  radiation ( $\lambda = 0.71073 \text{ \AA}$ ) with  $\omega$  and  $\varphi$  scans. Absorption corrections were carried out utilizing SADABS routine.<sup>2</sup> The structures were solved by the direct methods and refined by full-matrix least-squares refinements based on  $F^2$ .<sup>3</sup> Crystal data of **1**:  $\text{C}_{28}\text{H}_{28}\text{CoN}_4\text{NiO}_{10}$ ,  $M_r = 698.18$ ,  $T = 293(2) \text{ K}$ , monoclinic  $P2_1/c$ ,  $a = 16.091(12) \text{ \AA}$ ,  $b = 8.987(6) \text{ \AA}$ ,  $c = 24.710(13) \text{ \AA}$ ,  $\beta = 128.62(3)^\circ$ ,  $V = 2792(3) \text{ \AA}^3$ ,  $Z = 4$ ,  $D_c = 1.661 \text{ g cm}^{-3}$ ,  $\mu = 1.336 \text{ mm}^{-1}$ ,  $R_{\text{int}} = 0.1002$ , final  $R_1 = 0.0517$ ,  $wR_2 = 0.1763$ ,  $S = 1.040$ .

**Crystallography for 2.** The diffraction data were collected with a Rigaku Saturn CCD area detector using graphite-monochromated Mo K $\alpha$  radiation ( $\lambda = 0.71073 \text{ \AA}$ ) with  $\omega$  and  $\varphi$  scans. Absorption corrections were carried out utilizing CrystalClear routine.<sup>4</sup> The structures were solved by the direct methods and refined by full-matrix least-squares refinements based on  $F^2$ .<sup>3</sup> Crystal data of **2**:  $\text{C}_{24}\text{H}_{24}\text{N}_4\text{CuNiO}_{12}$ ,  $M_r = 682.72$ ,  $T = 113(2) \text{ K}$ , monoclinic  $P2_1/n$ ,  $a = 15.674(3) \text{ \AA}$ ,  $b = 8.6916(17) \text{ \AA}$ ,  $c = 19.060(4) \text{ \AA}$ ,  $\beta = 91.30(3)^\circ$ ,  $V = 2595.9(9) \text{ \AA}^3$ ,  $Z = 4$ ,  $D_c = 1.747 \text{ g cm}^{-3}$ ,  $\mu = 1.619 \text{ mm}^{-1}$ ,  $R_{\text{int}} = 0.0363$ , final  $R_1 = 0.0333$ ,  $wR_2 = 0.0945$ ,  $S = 1.100$ .

**Crystallography for 3.** The diffraction data were collected with a Bruker P4/CCD diffractometer using graphite-monochromated Mo K $\alpha$  radiation ( $\lambda = 0.71073$  Å) with  $\omega$  scans. Absorption corrections were carried out utilizing SADABS routine.<sup>2</sup> The structures were solved by the direct methods and refined by full-matrix least-squares refinements based on  $F^2$ .<sup>3</sup> Crystal data of **3**: C<sub>24</sub>H<sub>24</sub>N<sub>4</sub>MnNiO<sub>12</sub>,  $M_r = 674.10$ ,  $T = 293(2)$  K, monoclinic  $P2_1/c$ ,  $a = 15.90(2)$  Å,  $b = 8.875(11)$  Å,  $c = 24.97(2)$  Å,  $\beta = 128.93(5)^\circ$ ,  $V = 2741(5)$  Å<sup>3</sup>,  $Z = 4$ ,  $D_c = 1.633$  g cm<sup>-3</sup>,  $\mu = 1.218$  mm<sup>-1</sup>,  $R_{\text{int}} = 0.1004$ , final  $R_1 = 0.0894$ ,  $wR_2 = 0.2940$ ,  $S = 1.064$ .

## References

- 1 X.-Z. Li, P.-P. Hao, D. Wang, W.-Q. Zhang and L.-N. Zhu, *CrystEngComm*, 2012, **14**, 366.
- 2 G. M. Sheldrick, SADABS, Program for Empirical Absorption Correction of Area Detector Data. University of Göttingen, Germany, 1996.
- 3 G. M. Sheldrick, SHELXL-97, program for the refinement of the crystal structures. University of Göttingen, Germany, 1997.
- 4 Crystal Structure 3.7.0 and Crystalclear 1.36: Crystal Structure Analysis Package. Rigaku and Rigaku/MSO (2000-2005), The Woodlands, TX.

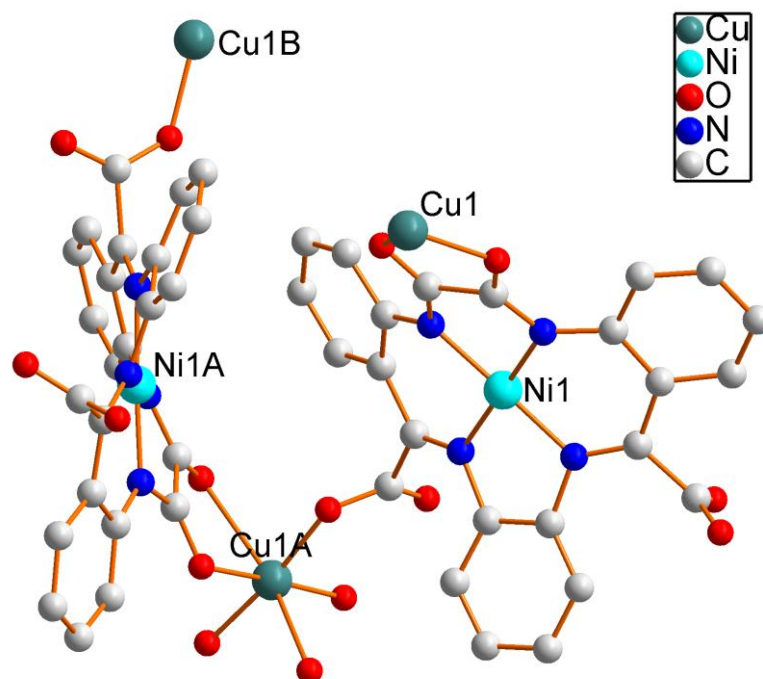

**Fig. S1** Plot showing the coordination environments of Ni and Cu atoms, and the coordination mode, “head-to-tail” arrangement and saddle shape of  $\text{NiL}^1$  in **2**. (Hydrogen atoms and coordinated solvent molecules have been omitted for clarity.)

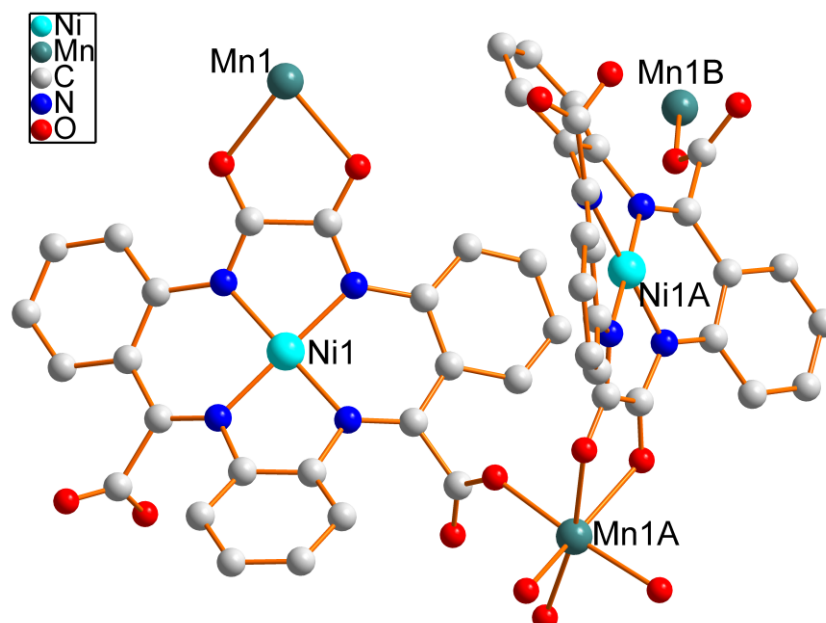

**Fig. S2** Plot showing the coordination environments of Ni and Mn atoms, and the coordination mode, “head-to-tail” arrangement and saddle shape of  $\text{NiL}^1$  in **3**. (Hydrogen atoms and coordinated solvent molecules have been omitted for clarity.)

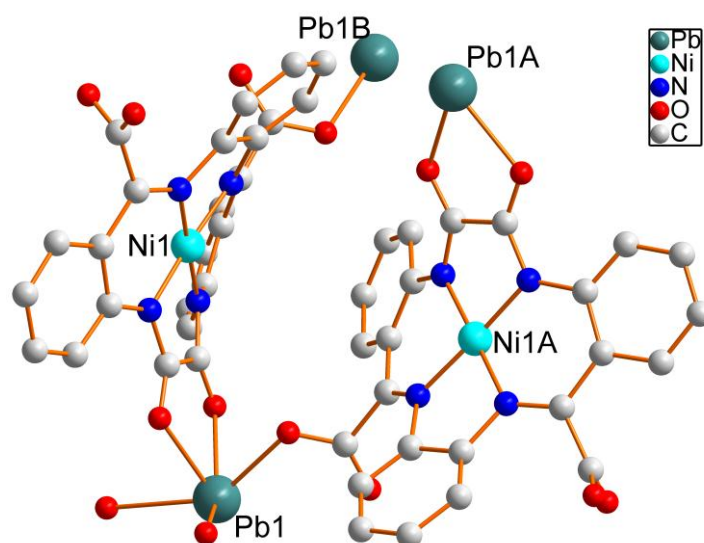

**Fig. 3** Plot showing the coordination environments of Ni and Pb atoms, and the coordination mode, “head-to-tail” arrangement and saddle shape of  $\text{NiL}^1$  in  $\text{Pb-NiL}^1$ . (Hydrogen atoms and coordinated solvent molecules have been omitted for clarity.)

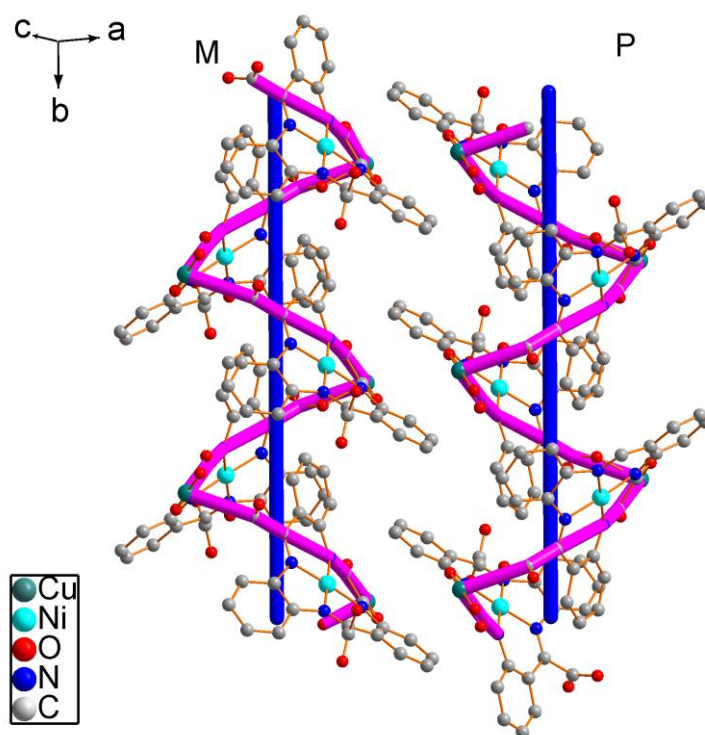

**Fig. S4** Left- (M) and right-handed (P) helical chains in **2**. (Hydrogen atoms and coordinated solvent molecules have been omitted for clarity.)

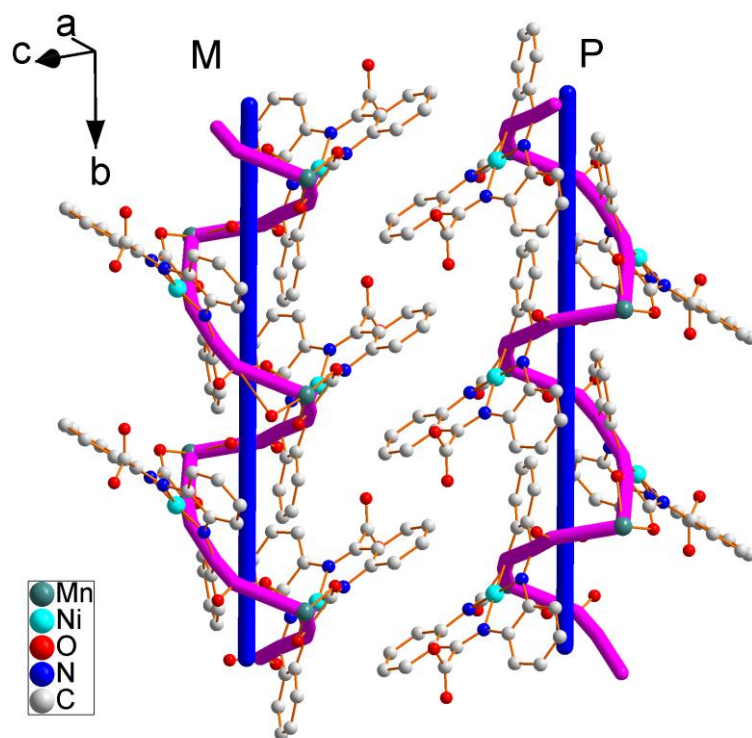

**Fig. S5** Left- (M) and right-handed (P) helical chains in **3**. (Hydrogen atoms and coordinated solvent molecules have been omitted for clarity.)

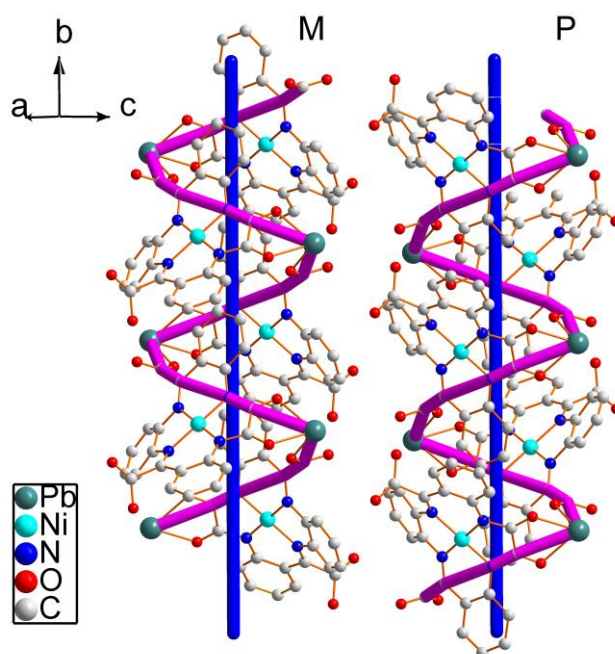

**Fig. S6** Left- (M) and right-handed (P) helical chains in Pb-NiL<sup>1</sup>. (Hydrogen atoms and coordinated solvent molecules have been omitted for clarity.)

**Table S1** Dihedral angles (°) between mean planes of every NiL<sup>1</sup> ligand in **1–3** and the reported compounds containing NiL<sup>1</sup>.

| Complex code           | Formula                                                                                                                                                             | Angle 1 <sup>a</sup> | Angle 2 <sup>b</sup> | Angle 3 <sup>c</sup>                  |
|------------------------|---------------------------------------------------------------------------------------------------------------------------------------------------------------------|----------------------|----------------------|---------------------------------------|
| <b>1</b>               | {[Co(NiL <sup>1</sup> )(C <sub>2</sub> H <sub>5</sub> OH)(CH <sub>3</sub> OH)(H <sub>2</sub> O)]·CH <sub>3</sub> OH} <sub>n</sub>                                   | 129.3 (1)            | 132.7(1)             | 61.2(2), 57.2(5)                      |
| <b>2</b>               | {[Cu(NiL <sup>1</sup> )(H <sub>2</sub> O) <sub>3</sub> ]·3H <sub>2</sub> O} <sub>n</sub>                                                                            | 129.86(6)            | 135.12(6)            | 58.40(6), 57.2(5)                     |
| <b>3</b>               | {[Mn(NiL <sup>1</sup> )(H <sub>2</sub> O) <sub>3</sub> ]·3H <sub>2</sub> O} <sub>n</sub>                                                                            | 130.2(3)             | 133.9(3)             | 59.0(3), 56.8(9)                      |
| Fe-NiL <sup>1</sup>    | {[Fe(NiL <sup>1</sup> )(CH <sub>3</sub> OH)(H <sub>2</sub> O) <sub>2</sub> ] <sub>4</sub> ·3CH <sub>3</sub> OH·5H <sub>2</sub> O} <sub>n</sub> <sup>d</sup>         | 130.57(7)            | 134.16(8)            | 60.56(8), 57.4(2)                     |
| Ni-NiL <sup>1</sup>    | {[Ni(NiL <sup>1</sup> )(H <sub>2</sub> O) <sub>3</sub> ]·C <sub>2</sub> H <sub>5</sub> OH·2H <sub>2</sub> O} <sub>n</sub> <sup>d</sup>                              | 128.89(7)            | 133.04(8)            | 59.85(8), 67.5(3)                     |
| Zn-NiL <sup>1</sup>    | {[Zn <sub>2</sub> (NiL <sup>1</sup> ) <sub>2</sub> (H <sub>2</sub> O) <sub>6</sub> ]·8H <sub>2</sub> O} <sub>n</sub> <sup>d</sup>                                   | 127.4(2)<br>127.9(2) | 132.1(2)<br>132.4(2) | 60.6(2), 59.4(2),<br>57.7(5), 54.5(5) |
| Pb-NiL <sup>1</sup>    | {[Pb(NiL <sup>1</sup> )(H <sub>2</sub> O) <sub>2</sub> ]·3H <sub>2</sub> O} <sub>n</sub> <sup>e</sup>                                                               | 127.8(2)             | 135.0(3)             | 57.4(2), 63.3(2)                      |
| Ca-NiL <sup>1</sup>    | {[Ca(NiL <sup>1</sup> )(H <sub>2</sub> O) <sub>4</sub> ]·3H <sub>2</sub> O} <sub>n</sub> <sup>e</sup>                                                               | 119.8(2)             | 134.5(2)             | 62.5(3), 66.1(4)                      |
| Na-NiL <sup>1</sup>    | [Na <sub>8</sub> (NiL <sup>1</sup> ) <sub>4</sub> (C <sub>2</sub> H <sub>5</sub> OH) <sub>6</sub> (H <sub>2</sub> O) <sub>16</sub> ]·3H <sub>2</sub> O <sup>d</sup> | 123.9(2)<br>137.3(2) | 129.6(2)<br>141.1(2) | 63.9(3), 63.2(2)<br>57.2(5), 55.5(3)  |
| Cd-NiL <sup>1</sup> -A | {[Cd(NiL <sup>1</sup> )(H <sub>2</sub> O) <sub>2</sub> ]·2DMF} <sub>n</sub> <sup>d</sup>                                                                            | 118.7(4)             | 125.9(4)             | 64.9(1), 55.3(1)                      |
| Cd-NiL <sup>1</sup> -B | {[Cd(NiL <sup>1</sup> )(C <sub>2</sub> H <sub>5</sub> OH)] <sub>2</sub> ·H <sub>2</sub> O} <sub>n</sub> <sup>d</sup>                                                | 136.4(2)             | 134.4(2)             | 66.5(5), 63.8(3)                      |

- a. The dihedral angle between the plane defined by the oxamido group and the phenyl ring opposite to it.
- b. The dihedral angle between the two phenyl rings opposite to each other.
- c. The dihedral angle between the plane determined by every carboxylate group and the NiN<sub>4</sub> plane.
- d. See: X.-Z. Li, P.-P. Hao, D. Wang, W.-Q. Zhang and L.-N. Zhu, *CrystEngComm*, 2012, **14**, 366.
- e. See: X.-J. Kong, X.-Z. Li, S. Ren and L.-N. Zhu, *J. Coord. Chem.*, 2012, **65**, 3641.

**Table S2** Atom-to-atom distances (Å) shorter than 3.80 Å between the  $\pi\cdots\pi$  interacting NiL<sup>1</sup> ligands in the helical chains of Ca-NiL<sup>1</sup>.

|           |           |                        |           |
|-----------|-----------|------------------------|-----------|
| C1...C44  | 3.543(1)  | C4...C39 <sup>a</sup>  | 3.4746(9) |
| C1...C45  | 3.676(1)  | C4...C40 <sup>a</sup>  | 3.3543(9) |
| C2...C43  | 3.513(1)  | C4...N8 <sup>a</sup>   | 3.399(1)  |
| C5...C32  | 3.629(1)  | C4...Ni2 <sup>a</sup>  | 3.773(1)  |
| C5...O9   | 3.729(1)  | C5...C35 <sup>a</sup>  | 3.531(1)  |
| C6...C27  | 3.490(1)  | C5...C40 <sup>a</sup>  | 3.5217(9) |
| C6...C28  | 3.633(1)  | C5...N7 <sup>a</sup>   | 3.722(1)  |
| C6...C29  | 3.746(1)  | C5...N8 <sup>a</sup>   | 3.749(1)  |
| C6...C30  | 3.734(1)  | C5...Ni2 <sup>a</sup>  | 3.579(1)  |
| C6...C31  | 3.5561(8) | C6...C26 <sup>a</sup>  | 3.670(1)  |
| C6...C32  | 3.453(1)  | C7...C25 <sup>a</sup>  | 3.514(1)  |
| C7...C27  | 3.552(1)  | C7...C26 <sup>a</sup>  | 3.556(1)  |
| C7...C28  | 3.546(1)  | C7...O11 <sup>a</sup>  | 3.6245(9) |
| C11...C46 | 3.5090(8) | C7...O12 <sup>a</sup>  | 3.650(1)  |
| C11...C47 | 3.3375(8) | C8...C25 <sup>a</sup>  | 3.527(1)  |
| C12...C47 | 3.4669(9) | C8...O11 <sup>a</sup>  | 3.441(1)  |
| C16...C46 | 3.526(1)  | C9...O11 <sup>a</sup>  | 3.346(1)  |
| N3...C47  | 3.393(1)  | N3...O11 <sup>a</sup>  | 3.734(1)  |
| N3...C46  | 3.748(1)  | C19...C45 <sup>a</sup> | 3.438(1)  |
| N4...C46  | 3.754(1)  | C19...C46 <sup>a</sup> | 3.607(1)  |
| O1...C44  | 3.636(1)  | C20...C45 <sup>a</sup> | 3.5574(8) |
| O2...C41  | 3.354(1)  | C21...C45 <sup>a</sup> | 3.720(1)  |
| O2...C43  | 3.434(1)  | C22...C45 <sup>a</sup> | 3.749(1)  |
| O2...C44  | 3.6108(9) | C23...C44 <sup>a</sup> | 3.546(1)  |
| O2...N8   | 3.737(1)  | C23...C45 <sup>a</sup> | 3.625(1)  |
|           |           | C24...C44 <sup>a</sup> | 3.553(1)  |
|           |           | C24...C45 <sup>a</sup> | 3.469(1)  |

<sup>a</sup> -1+x, y, z

**Table S3** Atom-to-atom distances (Å) shorter than 3.80 Å between the  $\pi\cdots\pi$  interacting NiL<sup>1</sup> ligands in the helical chains of **1**.

|                        |          |                        |          |
|------------------------|----------|------------------------|----------|
| C21...C13 <sup>a</sup> | 3.693(7) | C12...C22 <sup>b</sup> | 3.646(6) |
| C22...C12 <sup>a</sup> | 3.646(6) | C13...C21 <sup>b</sup> | 3.693(7) |
| C22...C13 <sup>a</sup> | 3.520(7) | C13...C22 <sup>b</sup> | 3.520(7) |
| C22...C17 <sup>a</sup> | 3.661(6) | C17...C22 <sup>b</sup> | 3.661(6) |
| C22...O6 <sup>a</sup>  | 3.400(7) | C17...C23 <sup>b</sup> | 3.675(6) |
| C22...N4 <sup>a</sup>  | 3.565(5) | C19...C23 <sup>b</sup> | 3.799(6) |
| C23...C17 <sup>a</sup> | 3.675(6) | C20...C23 <sup>b</sup> | 3.779(6) |
| C23...C19 <sup>a</sup> | 3.799(6) | N1...C23 <sup>b</sup>  | 3.764(7) |
| C23...C20 <sup>a</sup> | 3.779(6) | N4...C22 <sup>b</sup>  | 3.565(5) |
| C23...N1 <sup>a</sup>  | 3.764(7) | N4...C23 <sup>b</sup>  | 3.725(6) |
| C23...N4 <sup>a</sup>  | 3.725(6) | C22...O6 <sup>b</sup>  | 3.400(7) |

<sup>a</sup> -x, -0.5+y, 1.5-z; <sup>b</sup> -x, 0.5+y, 1.5-z

**Table S4** Atom-to-atom distances (Å) shorter than 3.80 Å between the  $\pi\cdots\pi$  interacting NiL<sup>1</sup> ligands in the helical chains of **2**.

|                        |          |                        |          |
|------------------------|----------|------------------------|----------|
| C20...C22 <sup>a</sup> | 3.678(3) | C15...C22 <sup>b</sup> | 3.622(3) |
| C20...O2 <sup>a</sup>  | 3.755(3) | C16...C22 <sup>b</sup> | 3.734(3) |
| C20...N4 <sup>a</sup>  | 3.752(3) | C17...C21 <sup>b</sup> | 3.688(3) |
| C21...C17 <sup>a</sup> | 3.688(3) | C17...C22 <sup>b</sup> | 3.526(3) |
| C21...C19 <sup>a</sup> | 3.676(3) | C19...C21 <sup>b</sup> | 3.676(3) |
| C21...N3 <sup>a</sup>  | 3.762(3) | C22...C20 <sup>b</sup> | 3.678(3) |
| C21...N4 <sup>a</sup>  | 3.584(3) | N3...C21 <sup>b</sup>  | 3.762(3) |
| C22...C15 <sup>a</sup> | 3.622(3) | N3...C22 <sup>b</sup>  | 3.516(3) |
| C22...C16 <sup>a</sup> | 3.734(3) | N4...C20 <sup>b</sup>  | 3.752(3) |
| C22...C17 <sup>a</sup> | 3.526(3) | N4...C21 <sup>b</sup>  | 3.584(3) |
| C22...N3 <sup>a</sup>  | 3.516(3) | O2...C20 <sup>b</sup>  | 3.755(3) |
| C22...O6 <sup>a</sup>  | 3.307(3) | O6...C22 <sup>b</sup>  | 3.307(3) |

<sup>a</sup> 1.5-x, 0.5+y, 0.5-z; <sup>b</sup> 1.5-x, -0.5+y, 0.5-z

**Table S5** Atom-to-atom distances (Å) shorter than 3.80 Å between the  $\pi\cdots\pi$  interacting NiL<sup>1</sup> ligands in the helical chains of **3**.

|                        |         |                        |         |
|------------------------|---------|------------------------|---------|
| C18...C23 <sup>a</sup> | 3.73(2) | C13...C20 <sup>b</sup> | 3.62(1) |
| C18...O1 <sup>a</sup>  | 3.71(2) | C13...C21 <sup>b</sup> | 3.70(1) |
| C19...C22 <sup>a</sup> | 3.60(2) | C14...C20 <sup>b</sup> | 3.75(1) |
| C19...C17 <sup>a</sup> | 3.75(1) | C15...C20 <sup>b</sup> | 3.57(1) |
| C20...C13 <sup>a</sup> | 3.62(1) | C17...C19 <sup>b</sup> | 3.75(1) |
| C20...C14 <sup>a</sup> | 3.75(1) | C22...C19 <sup>b</sup> | 3.60(2) |
| C20...C15 <sup>a</sup> | 3.57(1) | C23...C18 <sup>b</sup> | 3.73(2) |
| C20...N3 <sup>a</sup>  | 3.52(1) | N3...C20 <sup>b</sup>  | 3.52(1) |
| C20...O6 <sup>a</sup>  | 3.46(1) | O1...C18 <sup>b</sup>  | 3.71(2) |
| C21...C13 <sup>a</sup> | 3.70(1) | O6...C20 <sup>b</sup>  | 3.46(1) |

<sup>a</sup> 2-x, -0.5+y, 0.5-z; <sup>b</sup> 2-x, 0.5+y, 0.5-z

**Table S6** Atom-to-atom distances (Å) shorter than 3.80 Å between the  $\pi\cdots\pi$  interacting NiL<sup>1</sup> ligands in the helical chains of Fe-NiL<sup>1</sup>.

|                        |          |                        |          |
|------------------------|----------|------------------------|----------|
| C15...C22 <sup>a</sup> | 3.484(3) | O6...C22 <sup>a</sup>  | 3.349(3) |
| C15...C23 <sup>a</sup> | 3.649(4) | O6...C21 <sup>a</sup>  | 3.791(3) |
| C16...C22 <sup>a</sup> | 3.628(3) | C21...C17 <sup>b</sup> | 3.616(3) |
| C17...C21 <sup>a</sup> | 3.616(3) | C21...C19 <sup>b</sup> | 3.738(4) |
| C17...C22 <sup>a</sup> | 3.621(4) | C21...C24 <sup>b</sup> | 3.736(4) |
| C19...C21 <sup>a</sup> | 3.738(4) | C21...N3 <sup>b</sup>  | 3.680(3) |
| C24...C21 <sup>a</sup> | 3.736(4) | C21...N4 <sup>b</sup>  | 3.764(3) |
| N3...C21 <sup>a</sup>  | 3.680(3) | C21...O6 <sup>b</sup>  | 3.791(3) |
| N3...C22 <sup>a</sup>  | 3.545(3) | C22...C15 <sup>b</sup> | 3.484(3) |
| N4...C21 <sup>a</sup>  | 3.764(3) |                        |          |

<sup>a</sup> 1.5-x, 0.5+y, 0.5-z; <sup>b</sup> 1.5-x, -0.5+y, 0.5-z

**Table S7** Atom-to-atom distances (Å) shorter than 3.80 Å between the  $\pi\cdots\pi$  interacting NiL<sup>1</sup> ligands in the helical chains of Ni-NiL<sup>1</sup>.

|                       |          |                       |          |
|-----------------------|----------|-----------------------|----------|
| C5...C2 <sup>a</sup>  | 3.727(5) | C2...C5 <sup>b</sup>  | 3.727(5) |
| C5...O2 <sup>a</sup>  | 3.722(5) | C2...O5 <sup>b</sup>  | 3.722(5) |
| C6...C3 <sup>a</sup>  | 3.647(5) | C3...C6 <sup>b</sup>  | 3.647(5) |
| C6...C9 <sup>a</sup>  | 3.764(4) | C9...C6 <sup>b</sup>  | 3.764(4) |
| C6...N2 <sup>a</sup>  | 3.635(5) | C9...C7 <sup>b</sup>  | 3.668(4) |
| C7...C9 <sup>a</sup>  | 3.668(4) | C11...C7 <sup>b</sup> | 3.758(4) |
| C7...O3 <sup>a</sup>  | 3.442(3) | C16...C7 <sup>b</sup> | 3.654(3) |
| C7...N3 <sup>a</sup>  | 3.580(4) | N2...C6 <sup>b</sup>  | 3.635(5) |
| C7...C11 <sup>a</sup> | 3.758(4) | N3...C7 <sup>b</sup>  | 3.580(4) |
| C7...C16 <sup>a</sup> | 3.654(3) | O3...C7 <sup>b</sup>  | 3.442(3) |

<sup>a</sup> -x, 0.5+y, 1.5-z; <sup>b</sup> -x, -0.5+y, 1.5-z

**Table S8** Atom-to-atom distances (Å) shorter than 3.80 Å between the  $\pi\cdots\pi$  interacting NiL<sup>1</sup> ligands in the helical chains of Zn-NiL<sup>1</sup>.

|           |          |                        |          |
|-----------|----------|------------------------|----------|
| C21...N6  | 3.752(8) | C1...C31 <sup>a</sup>  | 3.723(9) |
| C21...C27 | 3.659(9) | C15...C28 <sup>a</sup> | 3.787(9) |
| C21...C32 | 3.716(9) | C15...C29 <sup>a</sup> | 3.552(9) |
| C21...C33 | 3.649(9) | C16...C29 <sup>a</sup> | 3.609(9) |
| C21...O10 | 3.684(8) | C17...C29 <sup>a</sup> | 3.515(9) |
| C22...C33 | 3.694(9) | C17...C30 <sup>a</sup> | 3.607(9) |
| C22...O10 | 3.285(8) | C19...C30 <sup>a</sup> | 3.693(9) |
| C22...C35 | 3.625(9) | C24...C30 <sup>a</sup> | 3.632(9) |
| C22...N7  | 3.699(8) | N4...C29 <sup>a</sup>  | 3.452(8) |
|           |          | O1...C31 <sup>a</sup>  | 3.698(9) |

<sup>a</sup> -1.5+x, y, z

**Table S9** Atom-to-atom distances (Å) shorter than 3.80 Å between the  $\pi\cdots\pi$  interacting NiL<sup>1</sup> ligands in the helical chains of Pb-NiL<sup>1</sup>.

|                        |         |                        |         |
|------------------------|---------|------------------------|---------|
| C6...C22 <sup>a</sup>  | 3.60(1) | C2...N2 <sup>b</sup>   | 3.62(1) |
| C8...C5 <sup>a</sup>   | 3.66(1) | C5...C8 <sup>b</sup>   | 3.66(1) |
| C8...C19 <sup>a</sup>  | 3.74(1) | C7...C9 <sup>b</sup>   | 3.61(1) |
| C9...C7 <sup>a</sup>   | 3.61(1) | C7...N2 <sup>b</sup>   | 3.75(1) |
| C12...C19 <sup>a</sup> | 3.56(1) | C7...O2 <sup>b</sup>   | 3.55(1) |
| C12...C22 <sup>a</sup> | 3.72(1) | C19...C8 <sup>b</sup>  | 3.74(1) |
| N2...C2 <sup>a</sup>   | 3.62(1) | C19...C12 <sup>b</sup> | 3.56(1) |
| N2...C7 <sup>a</sup>   | 3.75(1) | C19...N3 <sup>b</sup>  | 3.63(1) |
| N3...C19 <sup>a</sup>  | 3.63(1) | C19...O6 <sup>b</sup>  | 3.27(1) |
| O2...C7 <sup>a</sup>   | 3.55(1) | C22...C6 <sup>b</sup>  | 3.60(1) |
| O6...C19 <sup>a</sup>  | 3.27(1) | C22...C12 <sup>b</sup> | 3.72(1) |

<sup>a</sup> 2-x, -0.5+y, 0.5-z; <sup>b</sup> 2-x, 0.5+y, 0.5-z

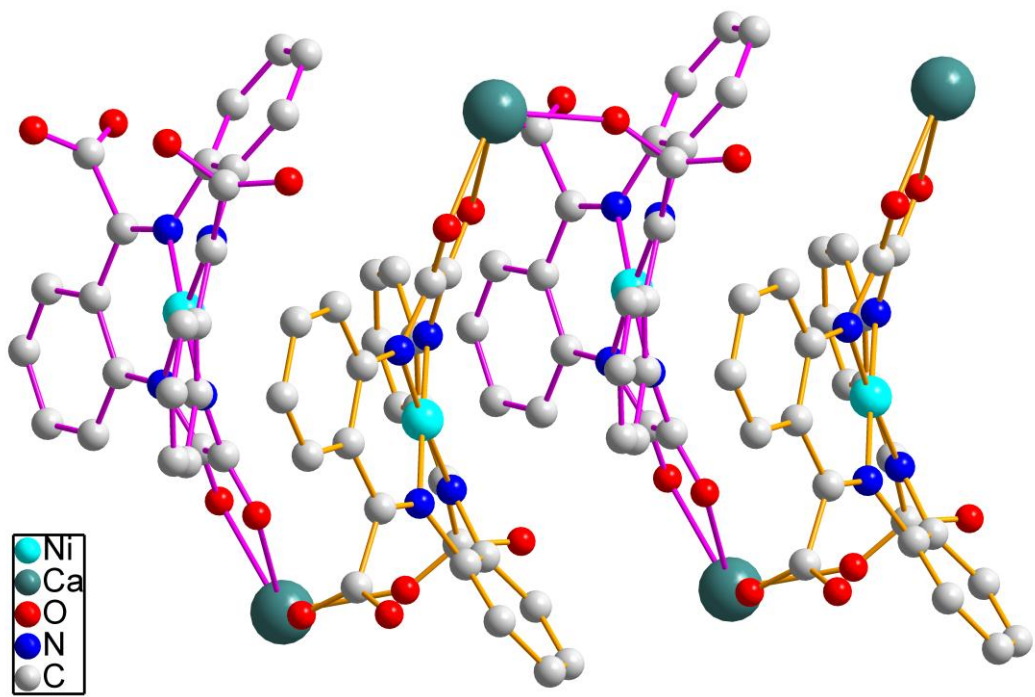

**Fig. S7** Plot showing the  $\pi\cdots\pi$  interactions between the adjacent NiL<sup>1</sup> ligands in a helical chain of

Ca-NiL<sup>1</sup>. (Hydrogen atoms and coordinated solvent molecules have been omitted for clarity.)

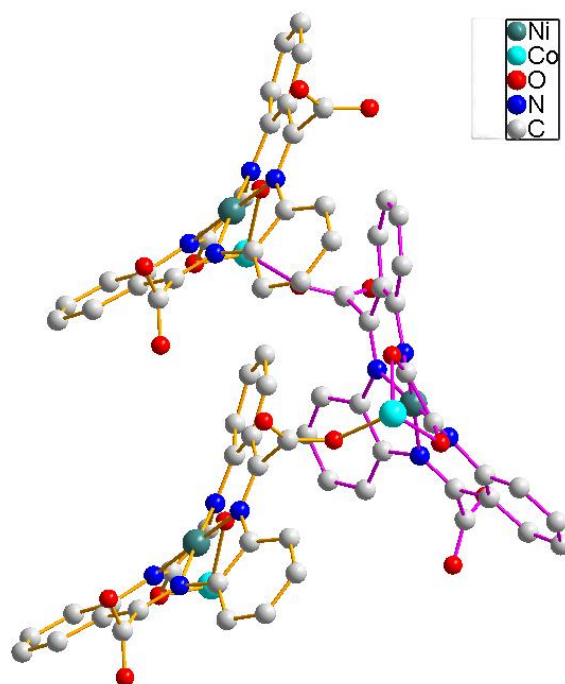

**Fig. S8** Plot showing the  $\pi \cdots \pi$  interactions between the adjacent NiL<sup>1</sup> ligands in a helical chain of 1. (Hydrogen atoms and coordinated solvent molecules have been omitted for clarity.)

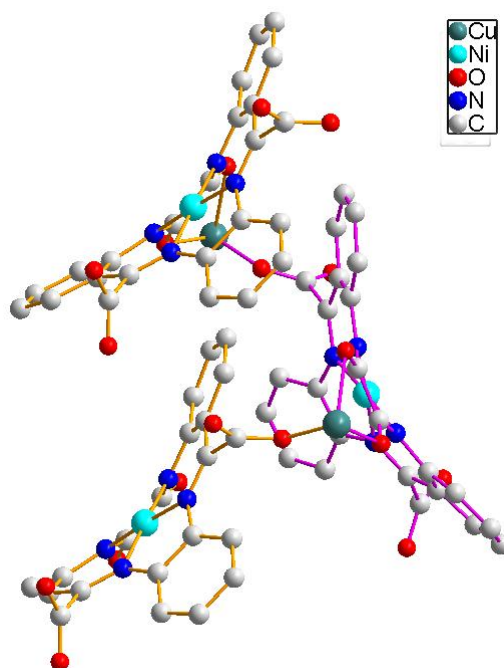

**Fig. S9** Plot showing the  $\pi \cdots \pi$  interactions between the adjacent NiL<sup>1</sup> ligands in a helical chain of 2. (Hydrogen atoms and coordinated solvent molecules have been omitted for clarity.)

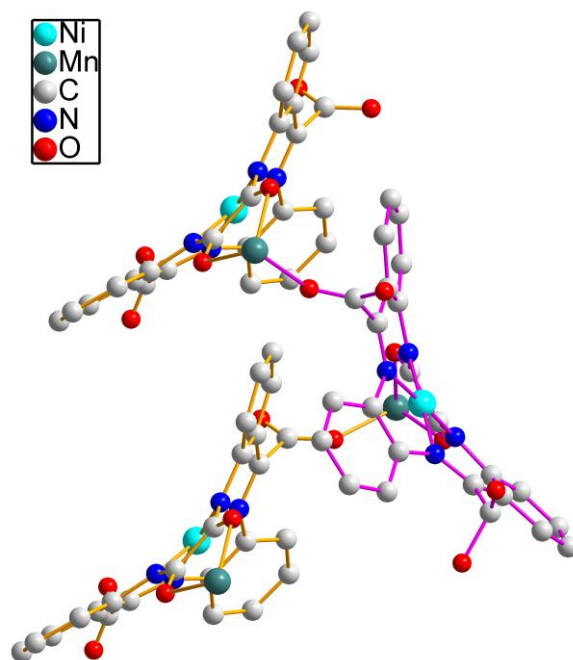

**Fig. S10** Plot showing the  $\pi\cdots\pi$  interactions between the adjacent  $\text{NiL}^1$  ligands in a helical chain of **3**. (Hydrogen atoms and coordinated solvent molecules have been omitted for clarity.)

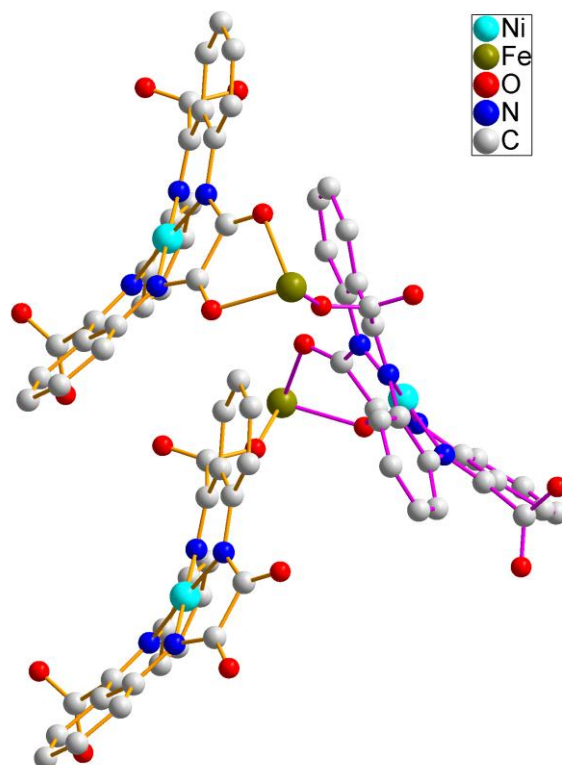

**Fig. S11** Plot showing the  $\pi\cdots\pi$  interactions between the adjacent  $\text{NiL}^1$  ligands in a helical chain of  $\text{Fe-NiL}^1$ . (Hydrogen atoms and coordinated solvent molecules have been omitted for clarity.)

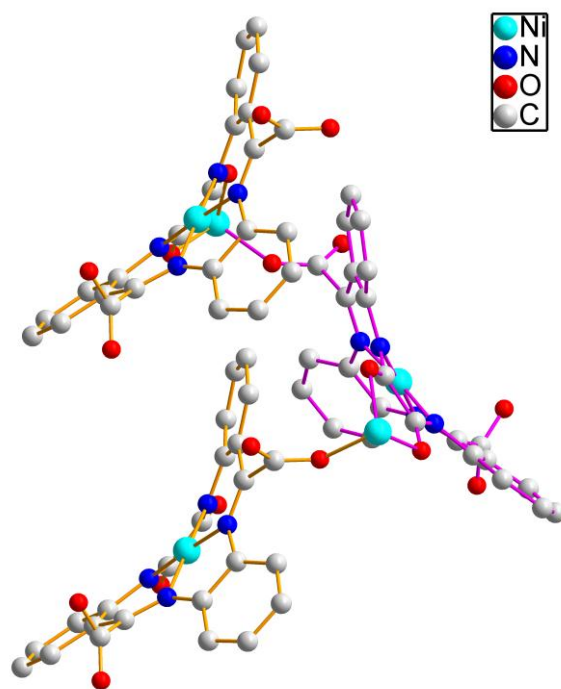

**Fig. S12** Plot showing the  $\pi \cdots \pi$  interactions between the adjacent NiL<sup>1</sup> ligands in a helical chain of Ni-NiL<sup>1</sup>. (Hydrogen atoms and coordinated solvent molecules have been omitted for clarity.)

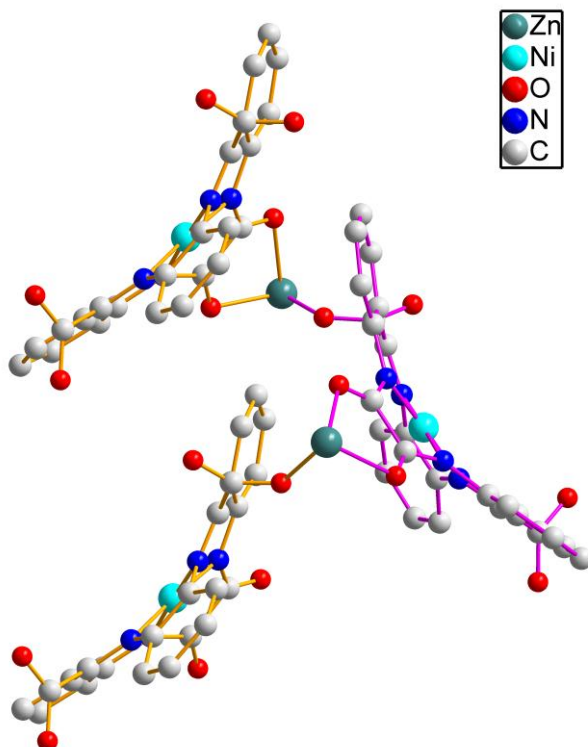

**Fig. S13** Plot showing the  $\pi \cdots \pi$  interactions between the adjacent NiL<sup>1</sup> ligands in a helical chain of Zn-NiL<sup>1</sup>. (Hydrogen atoms and coordinated solvent molecules have been omitted for clarity.)

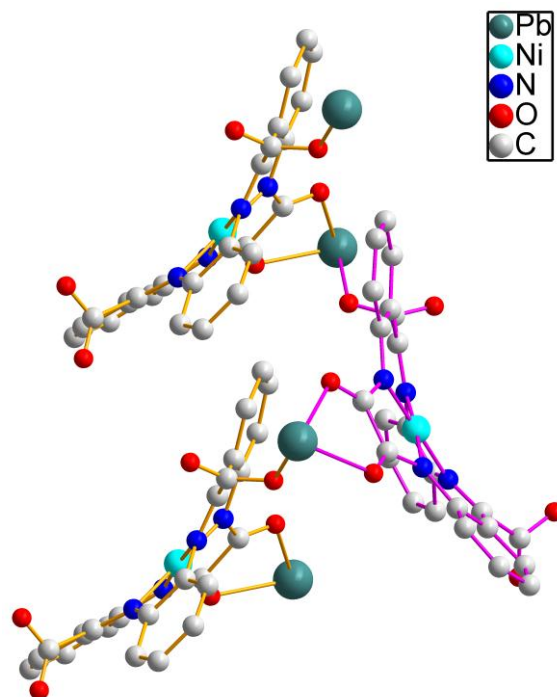

**Fig. S14** Plot showing the  $\pi \cdots \pi$  interactions between the adjacent NiL<sup>1</sup> ligands in a helical chain of Pb-NiL<sup>1</sup>. (Hydrogen atoms and coordinated solvent molecules have been omitted for clarity.)

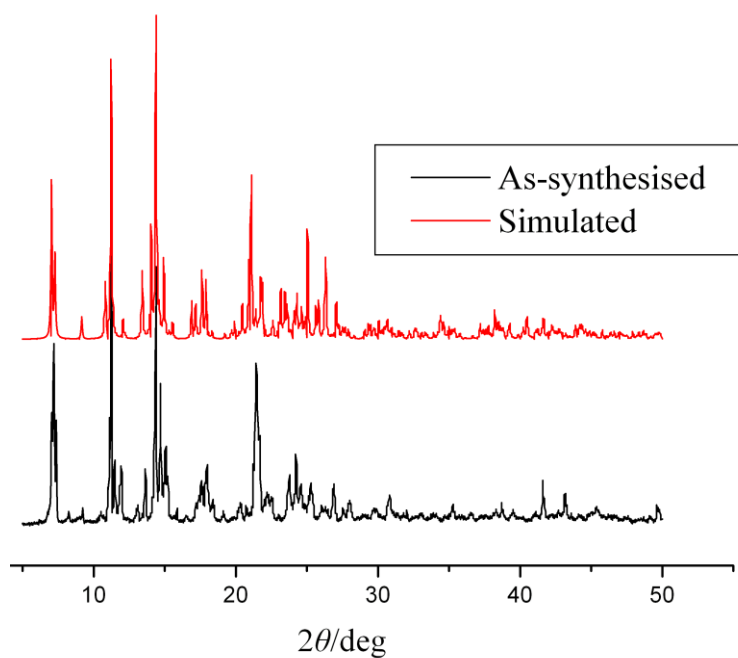

**Fig. S15** PXRD patterns of **1** simulated from the X-ray single-crystal structure and as-synthesized samples.

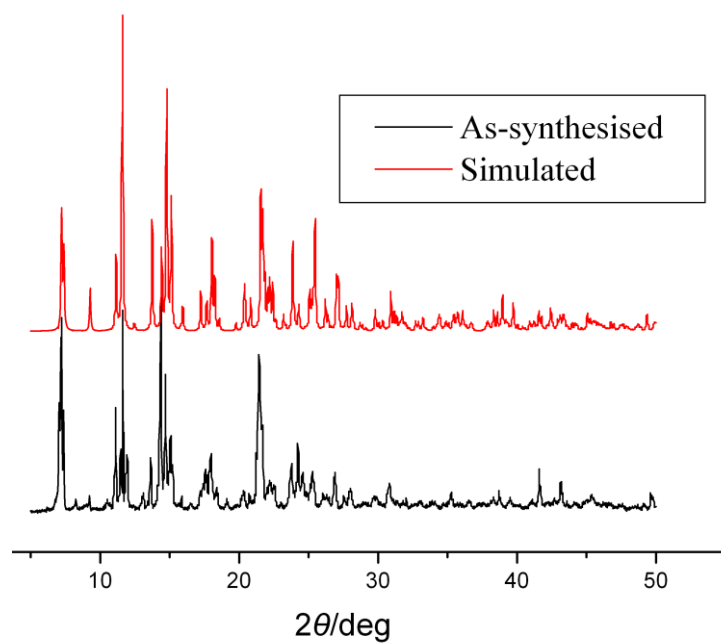

**Fig. S16** PXRD patterns of **2** simulated from the X-ray single-crystal structure and as-synthesized samples.

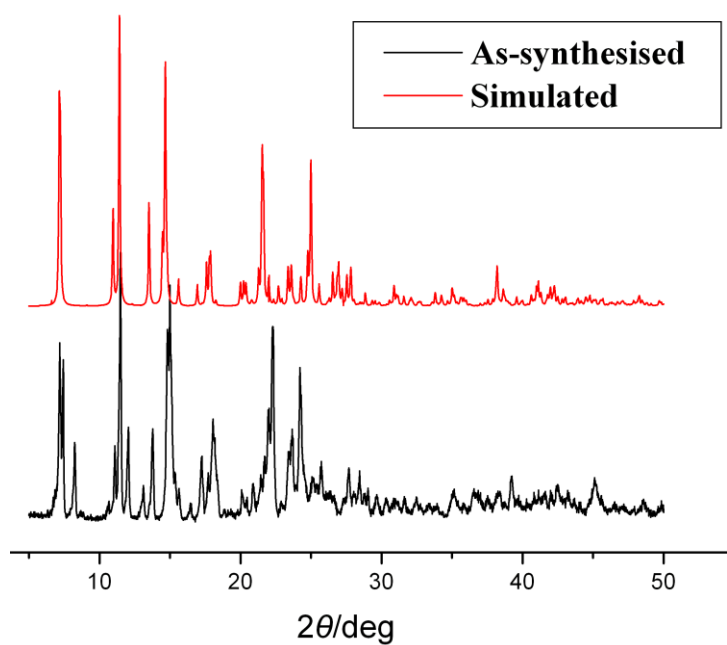

**Fig. S17** PXRD patterns of **3** simulated from the X-ray single-crystal structure and as-synthesized samples.

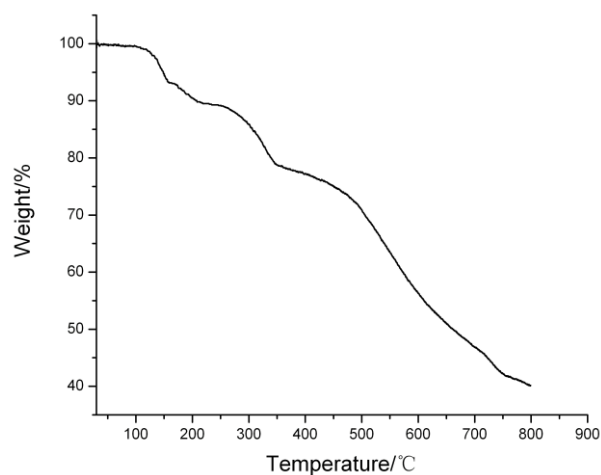

**Fig. S18** TGA plot of **1**.

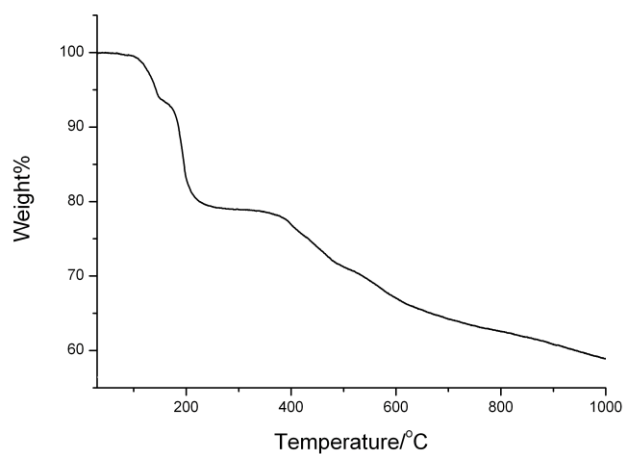

**Fig. S19** TGA plot of **2**.

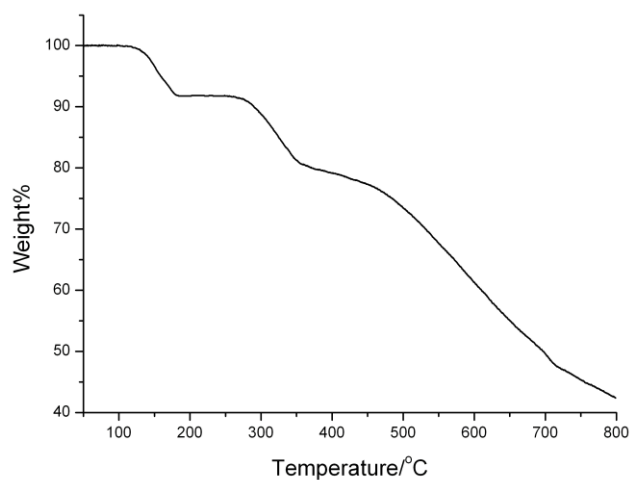

**Fig. S20** TGA plot of **3**.
